# Supplementary material for: Influenza Vaccination for Immunocompromised Patients: Systematic Review and Meta-Analysis from a Public Health Policy Perspective
Source: PubMed Central journal article supplement (PMC3245259; doi:10.1371/journal.pone.0029249), 2011-12-22

## Figure S2. Forest plots for immune response to vaccination question

Figure S2.1. Forest plot of studies of seroconversion ( $\geq 4$  fold rise in HI titre): seasonal influenza A/H1N1, vaccinated immunocompromised patients versus vaccinated immunocompetent controls

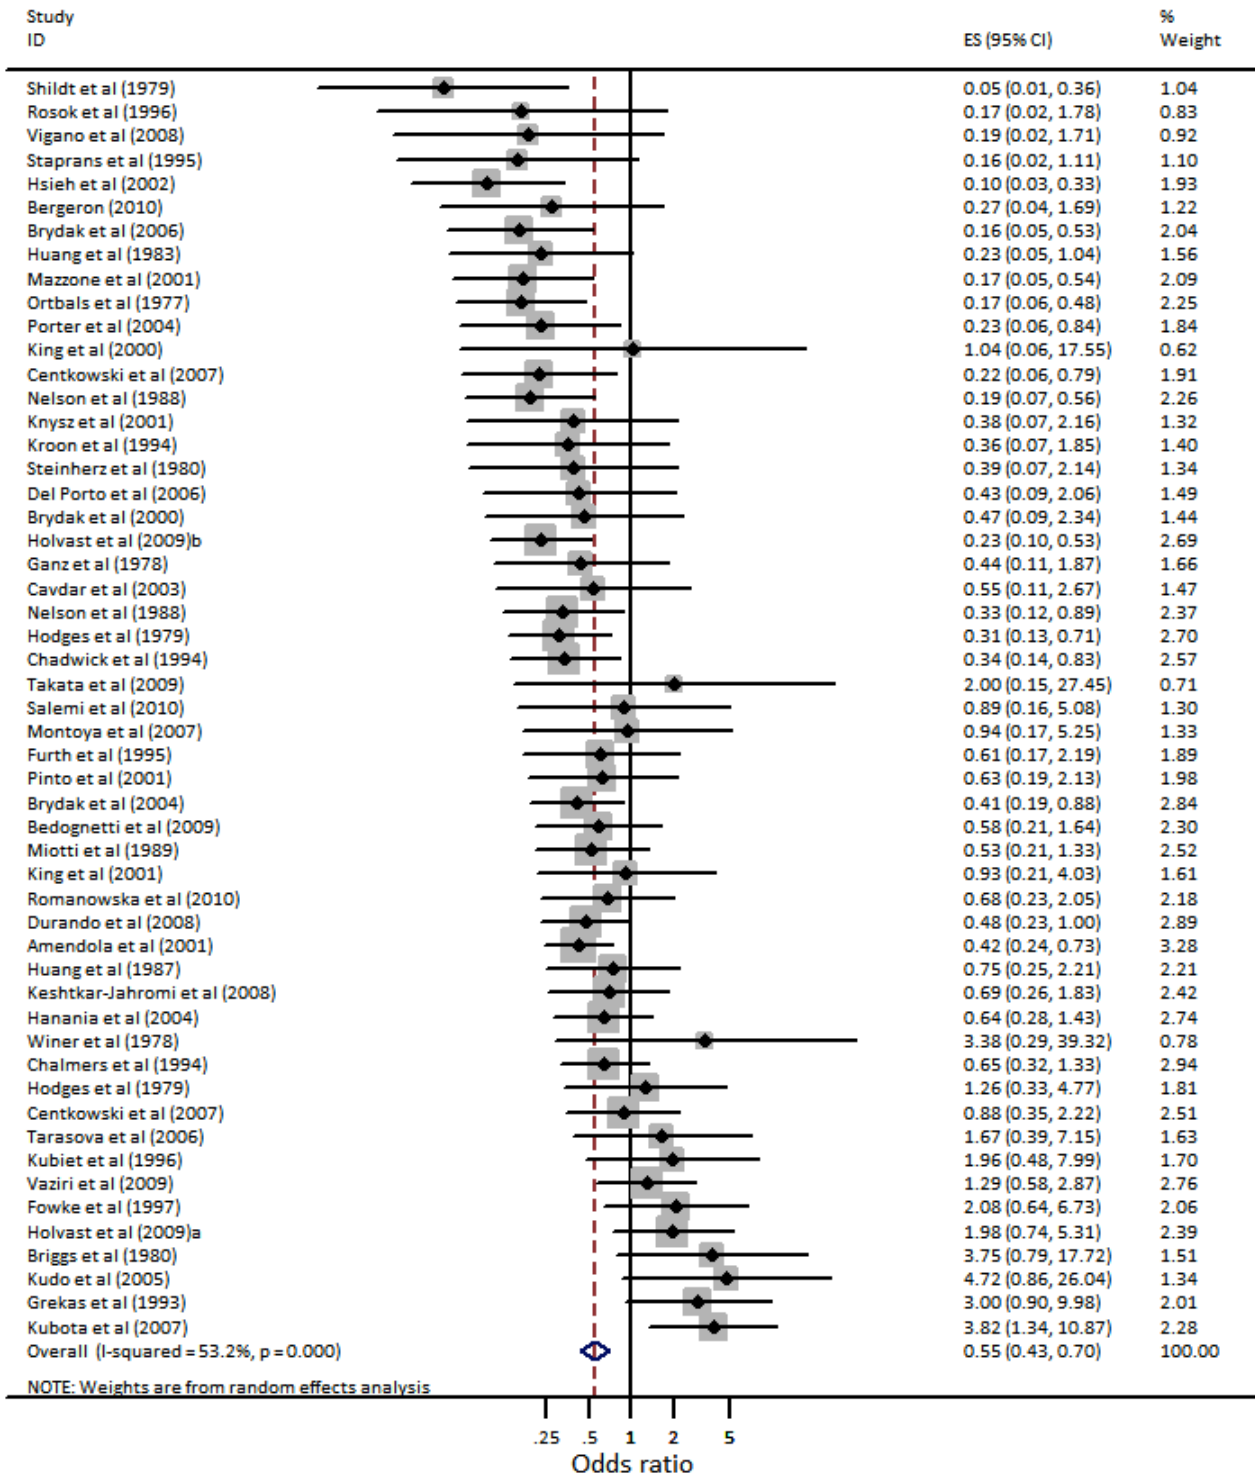

Figure S2.2. Forest plot of studies of seroconversion ( $\geq 4$  fold rise in HI titre): influenza A/H3N2, vaccinated immunocompromised patients versus vaccinated immunocompetent controls

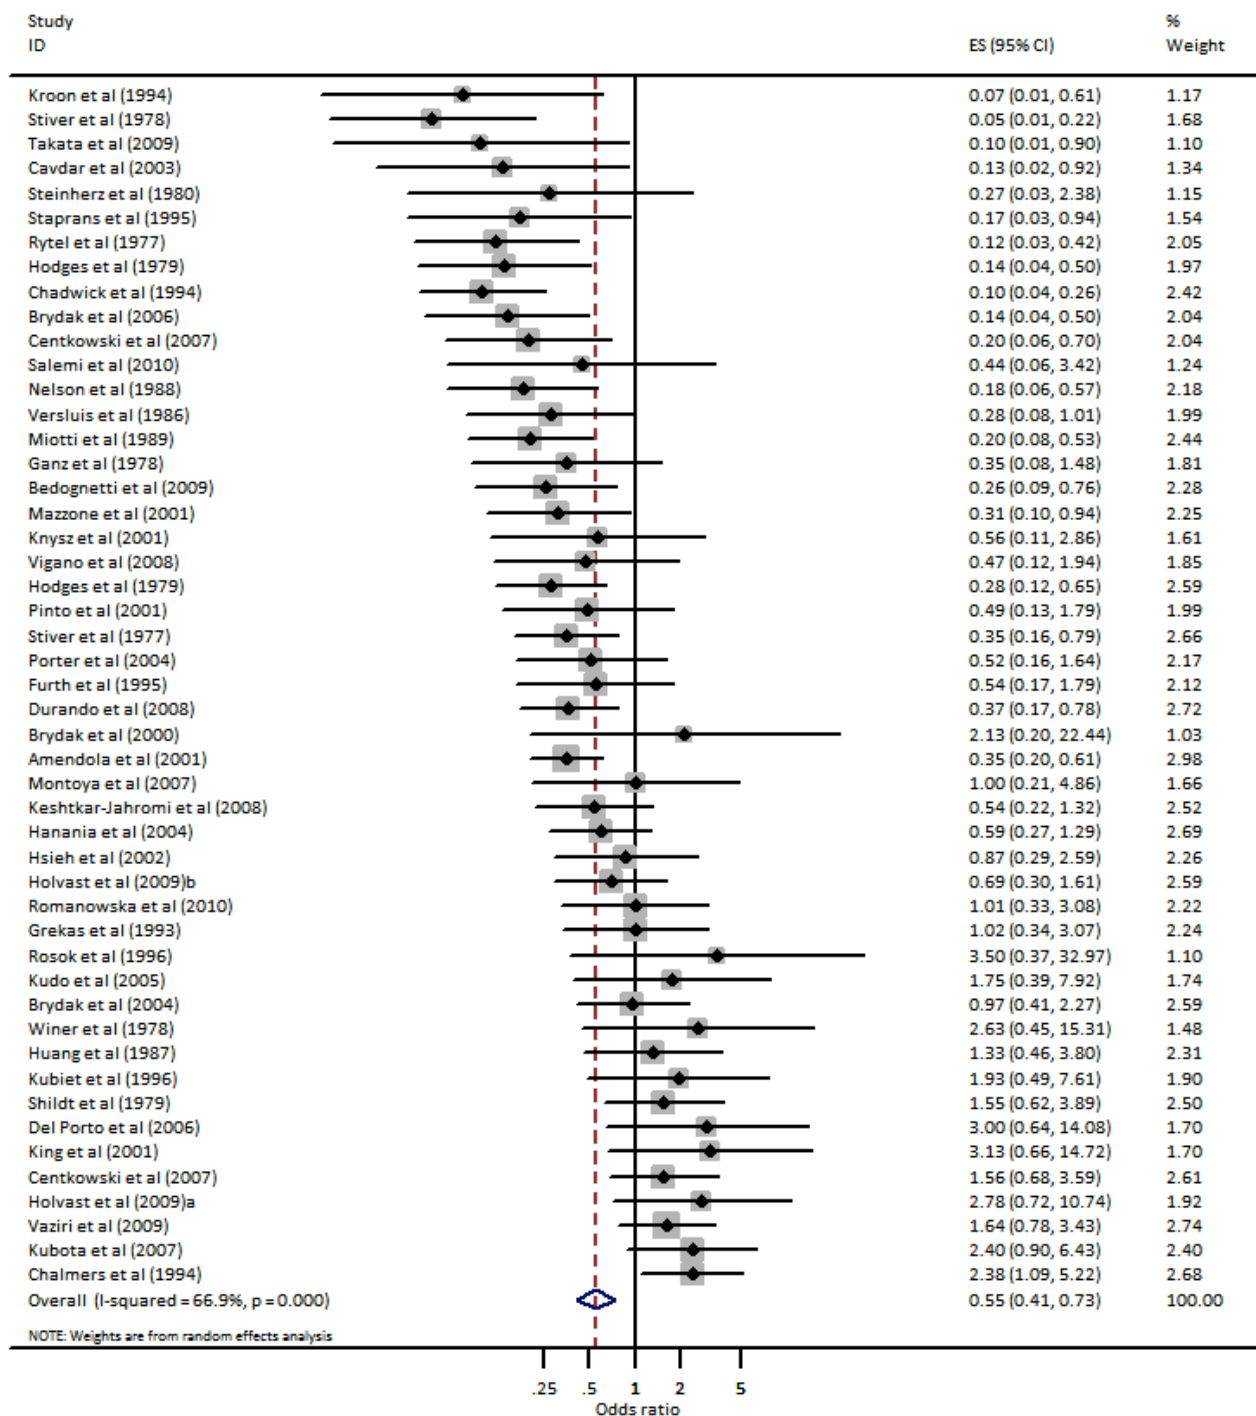

Figure AS2.3. Forest plot of studies of seroconversion ( $\geq 4$  fold rise in HI titre): seasonal influenza B, vaccinated immunocompromised patients versus vaccinated immunocompetent controls

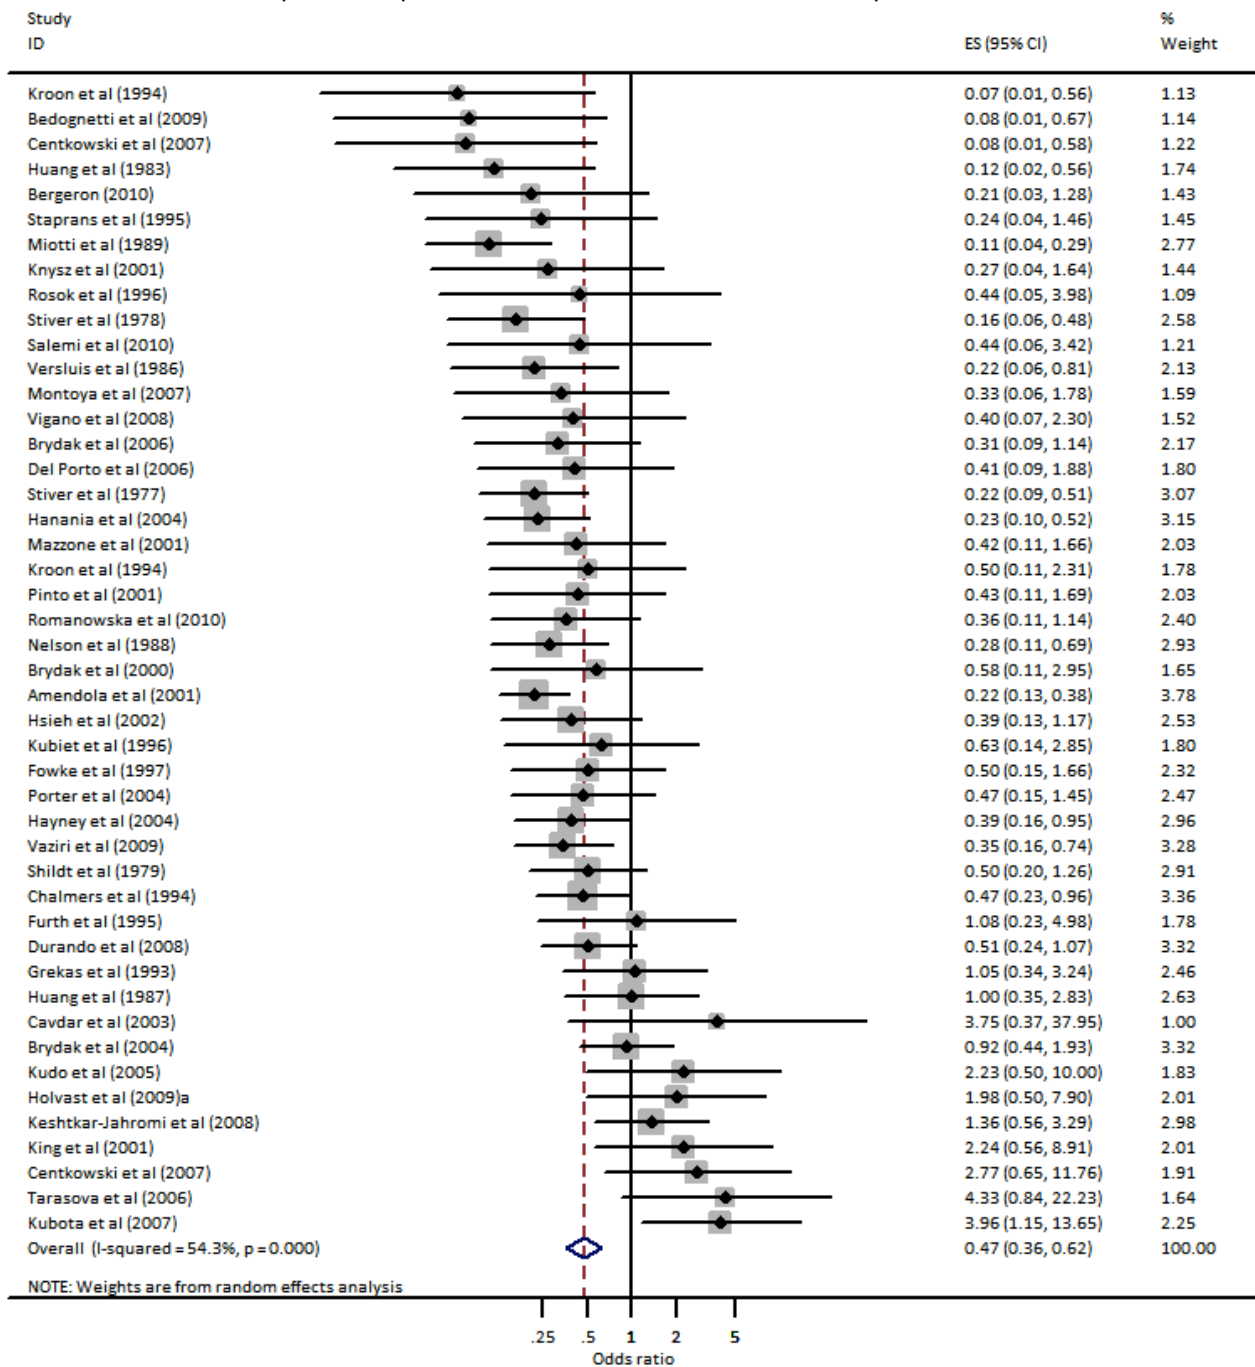

Figure AS2.4. Forest plot of studies of seroconversion ( $\geq 4$  fold rise in HI titre): seasonal influenza A/H1N1, vaccinated immunocompromised patients versus placebo or no vaccination

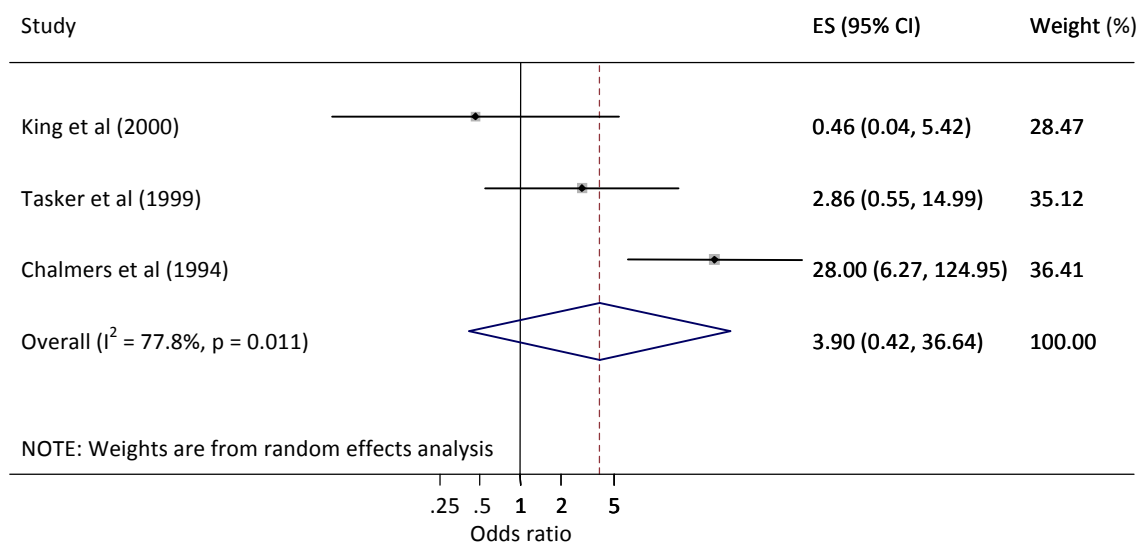

Figure S2.5. Forest plot of studies of seroconversion ( $\geq 4$  fold rise in HI titre): influenza A/H3N2, vaccinated immunocompromised patients versus placebo or no vaccination

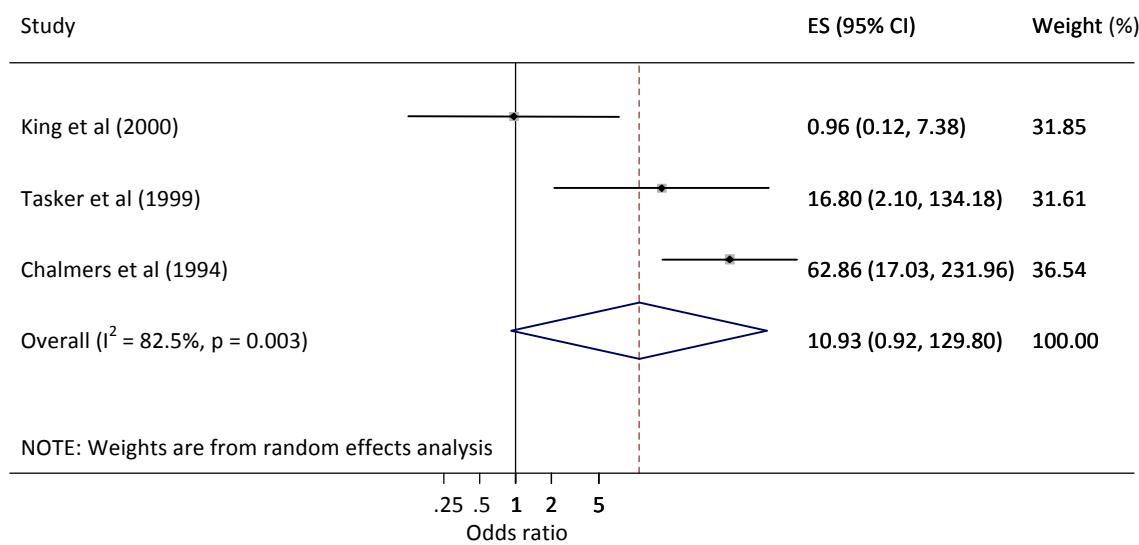

Figure S2.6. Forest plot of studies of seroconversion ( $\geq 4$  fold rise in HI titre): influenza B, vaccinated immunocompromised patients versus placebo or no vaccination

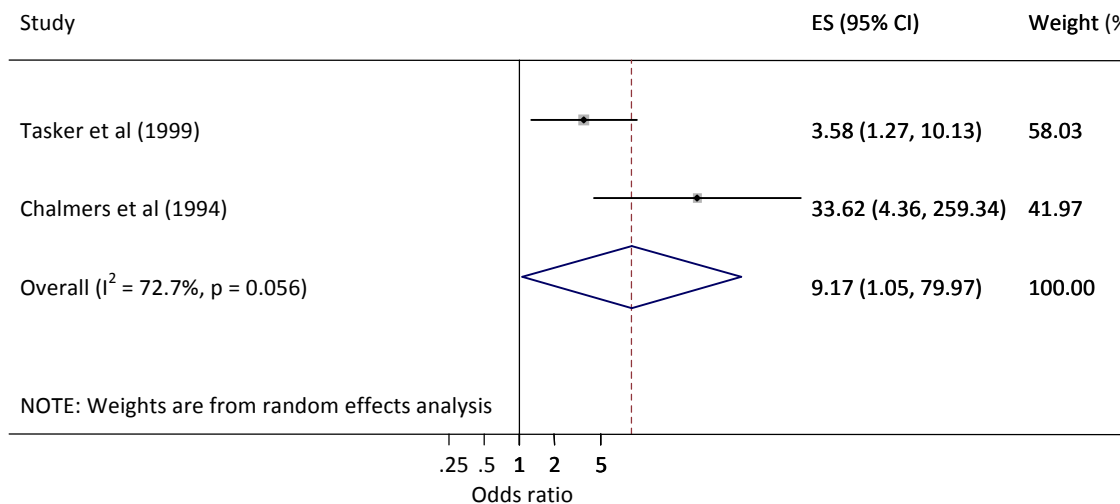

Figure S2.7. Forest plot of studies of seroconversion ( $< 1:40$  pre-vaccination to  $\geq 1:40$  HI titre post vaccination): seasonal influenza A/H1N1, vaccinated immunocompromised patients versus vaccinated immunocompetent controls

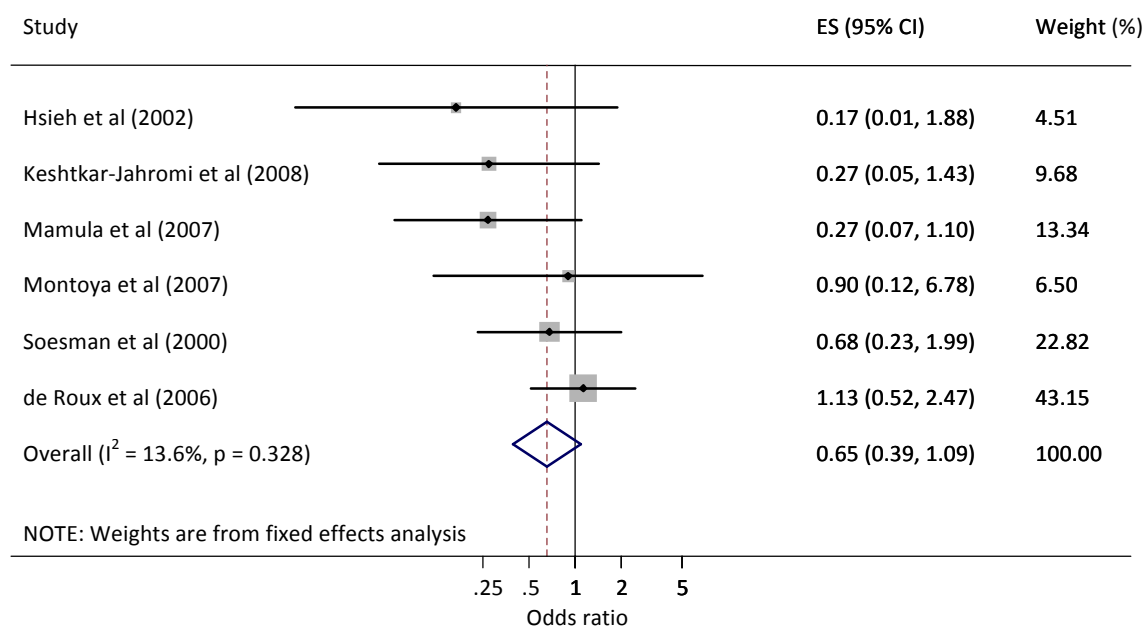

Figure S2.8. Forest plot of studies of seroconversion (<1:40 pre-vaccination to ≥1:40 HI titre post vaccination): influenza A/H3N2, vaccinated immunocompromised patients versus vaccinated immunocompetent controls

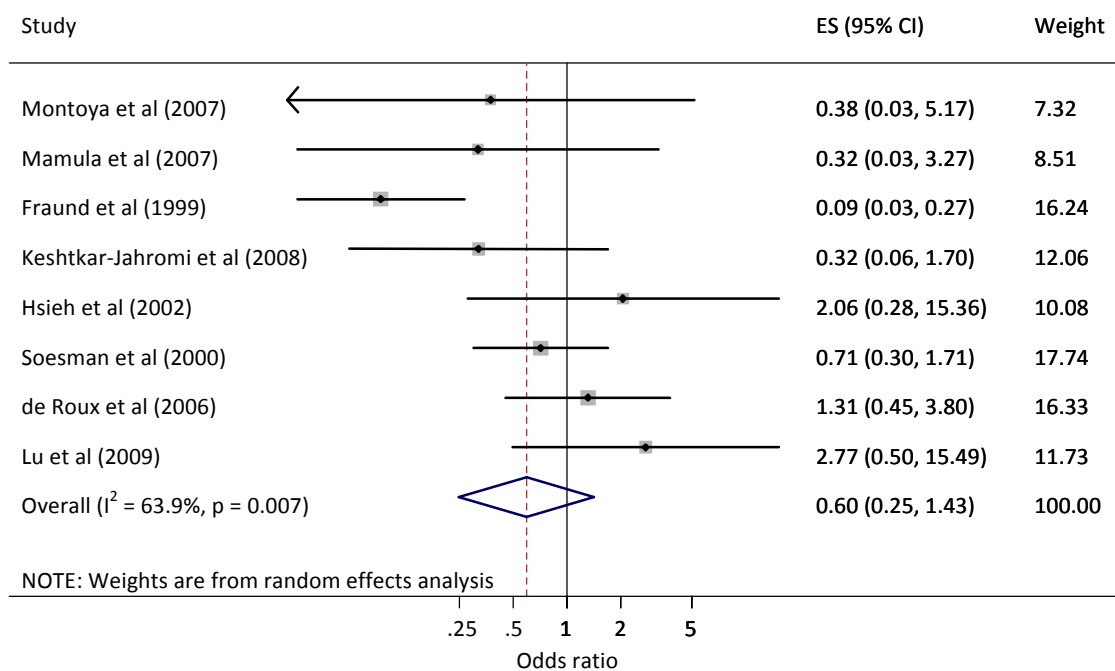

Figure S2.9. Forest plot of studies of seroconversion (<1:40 pre-vaccination to ≥1:40 HI titre post vaccination): seasonal influenza B, vaccinated immunocompromised patients versus vaccinated immunocompetent controls

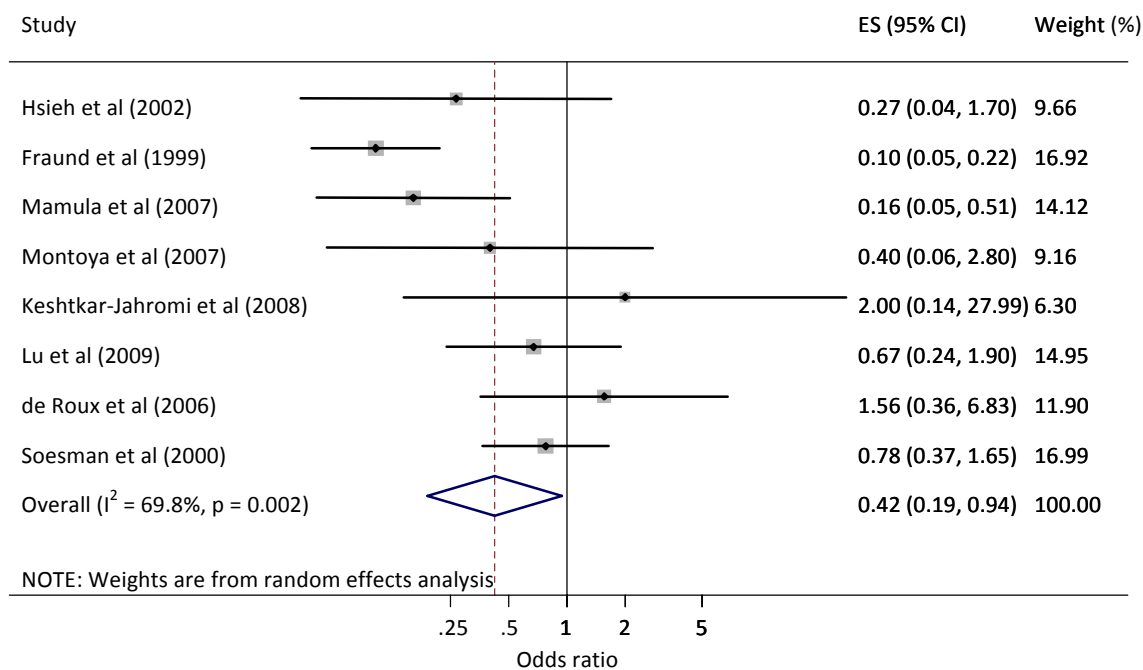

Figure S2.10. Forest plot of studies of seroprotection ( $\geq 1:40$  HI titre post vaccination): seasonal influenza A/H1N1, vaccinated immunocompromised patients versus vaccinated immunocompetent controls

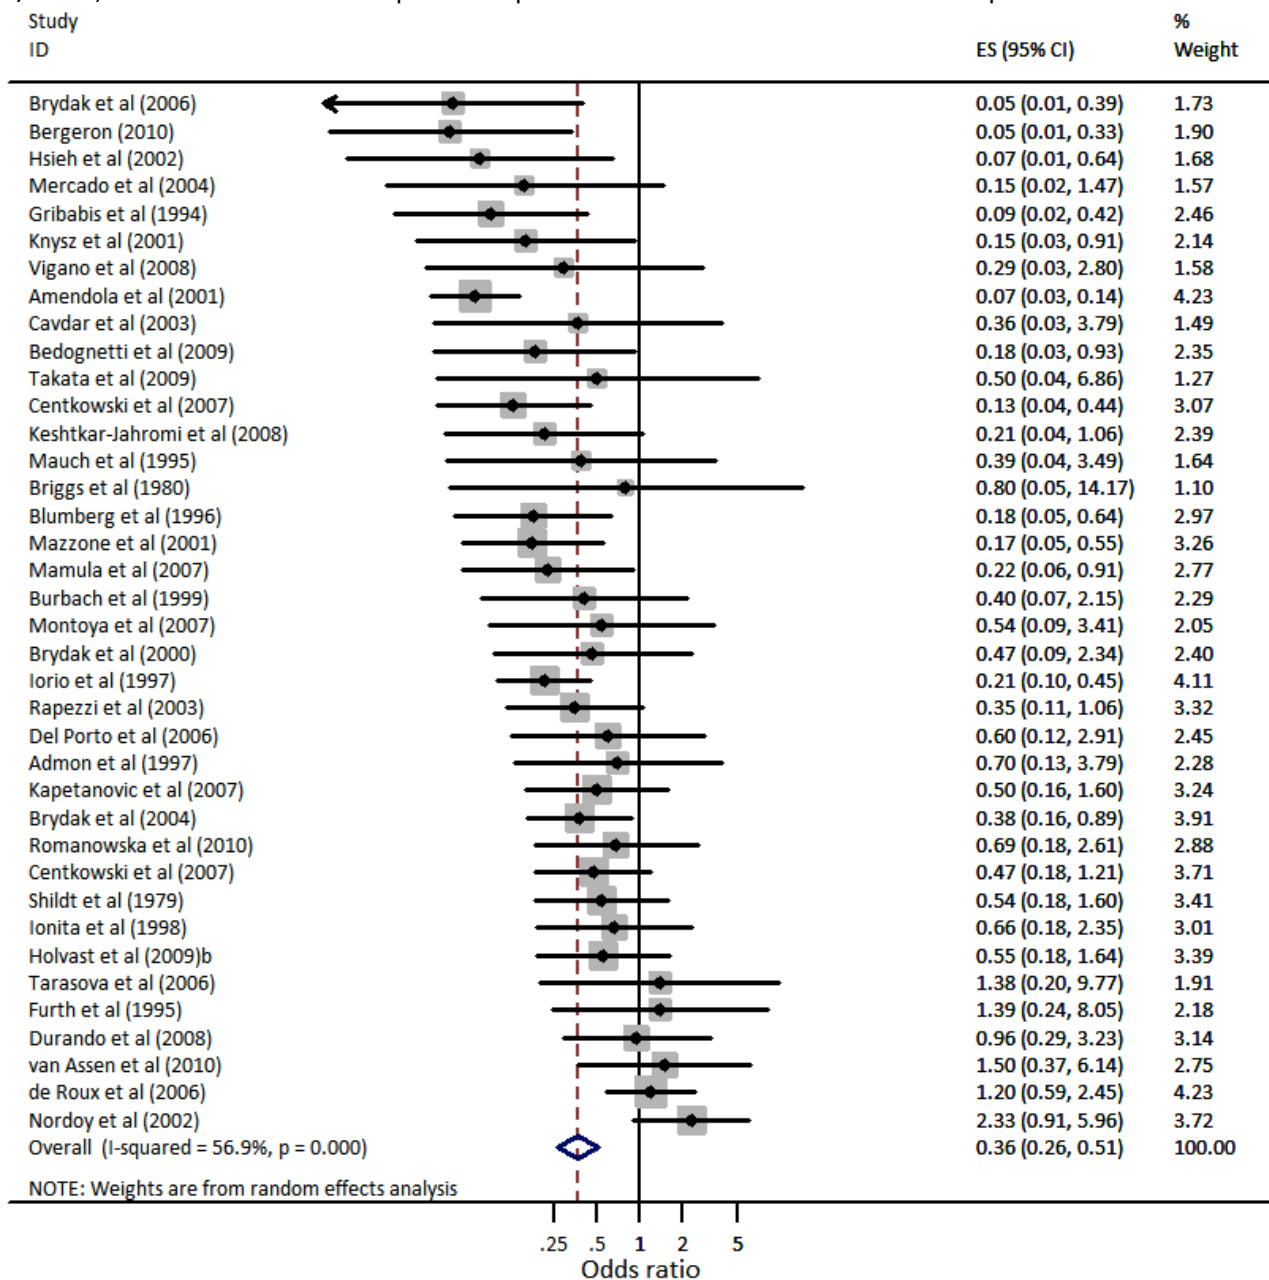

Figure S2.11. Forest plot of studies of seroprotection ( $\geq 1:40$  HI titre post vaccination): influenza A/H3N2, vaccinated immunocompromised patients versus vaccinated immunocompetent controls

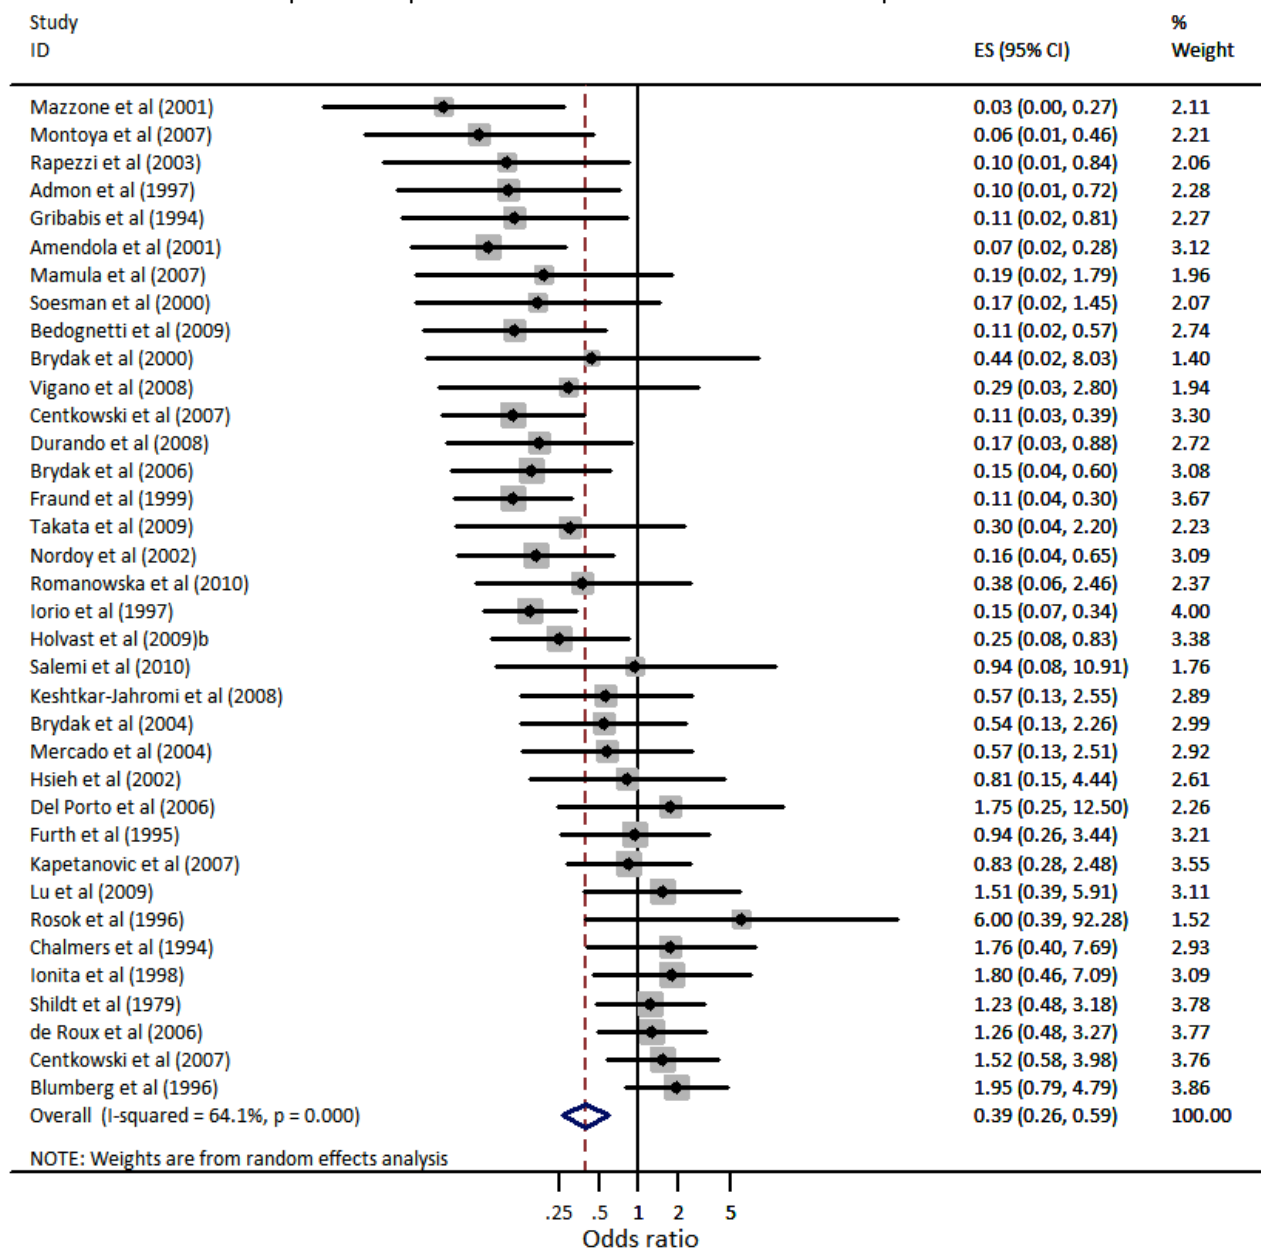



Figure S2.12. Forest plot of studies of seroprotection ( $\geq 1:40$  HI titre post vaccination): seasonal influenza B, vaccinated immunocompromised patients versus vaccinated immunocompetent controls

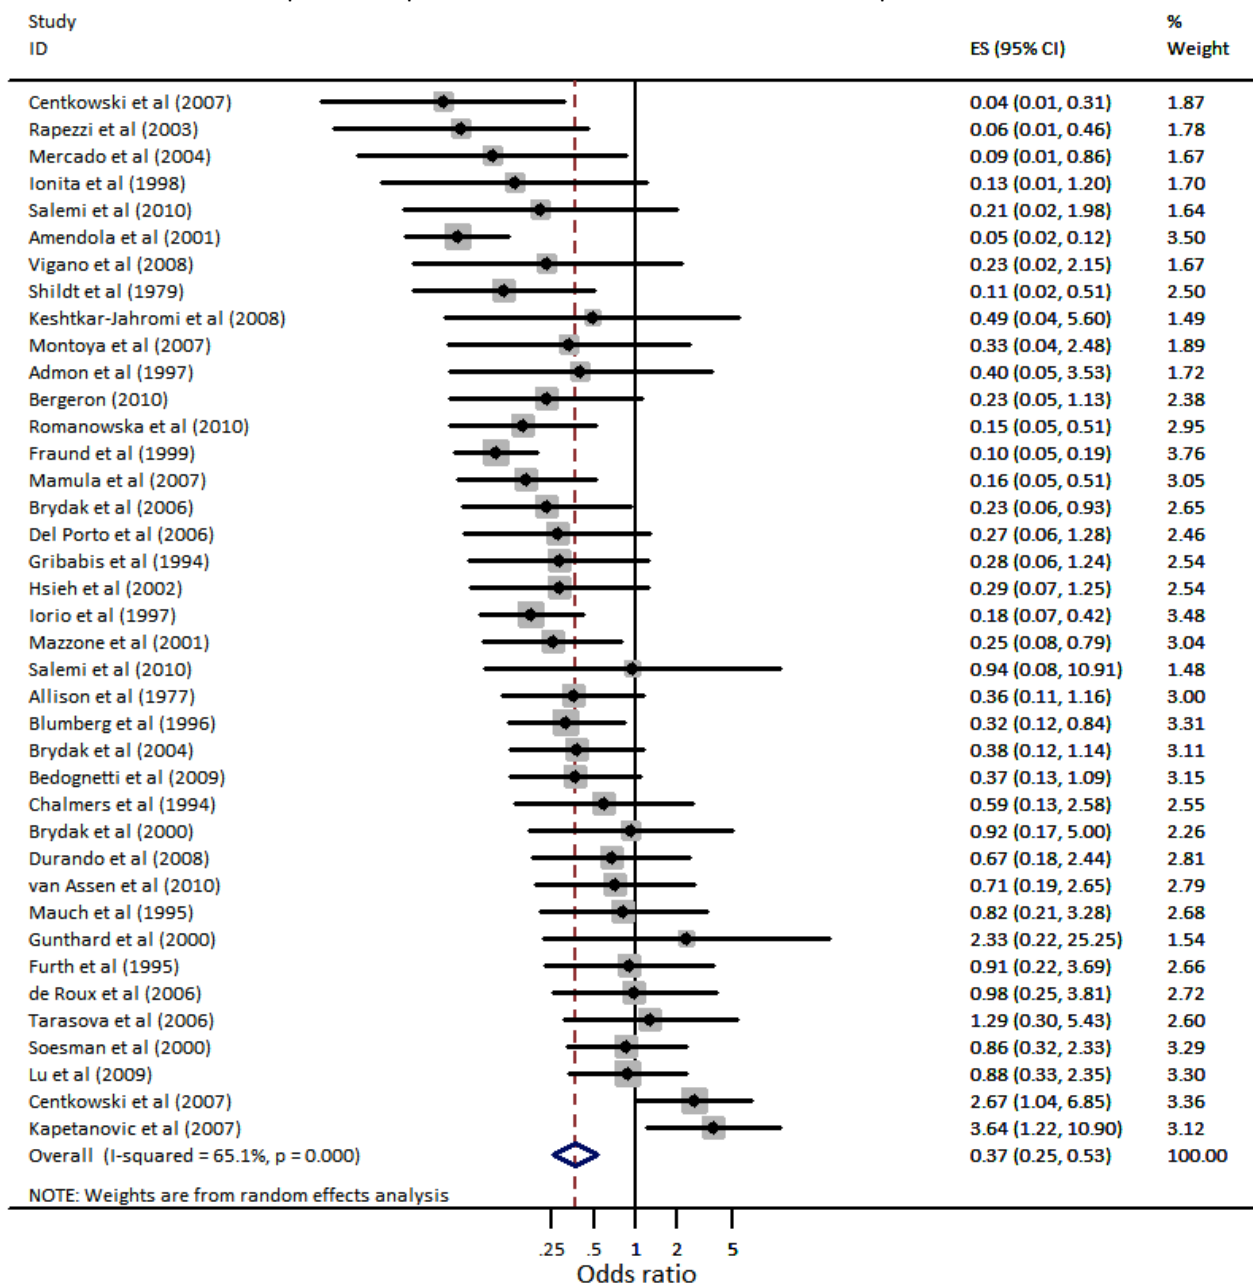

Figure S2.13. Forest plot of studies of seroprotection ( $\geq 1:40$  HI titre post vaccination): pandemic influenza A/H1N1, vaccinated immunocompromised patients versus vaccinated immunocompetent controls

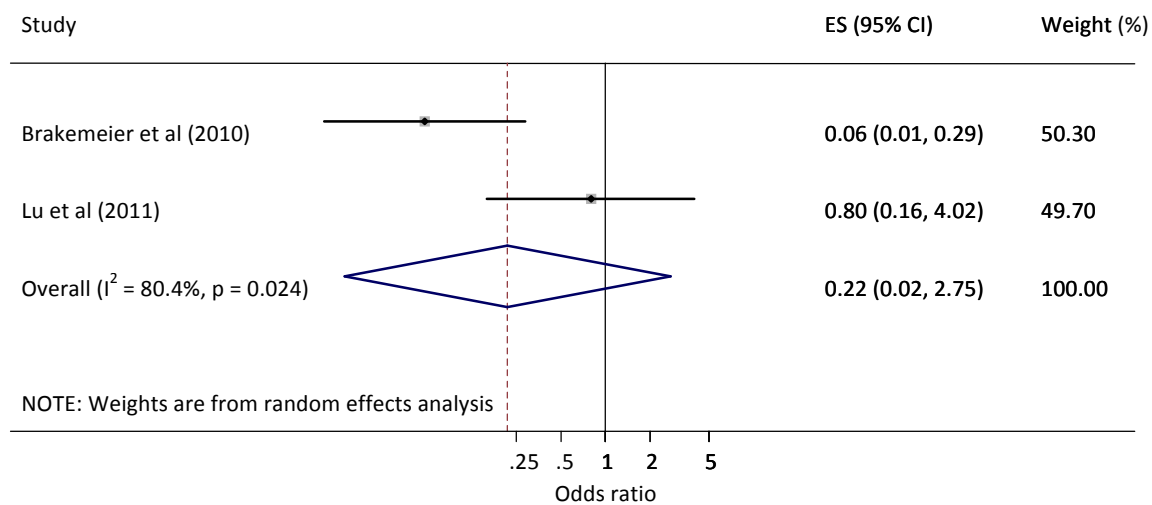

Supplement: pone.0029249.s002.pdf [file pone.0029249.s002.pdf]
