# Supplementary material for: Influenza Vaccination for Immunocompromised Patients: Systematic Review and Meta-Analysis from a Public Health Policy Perspective
Source: PubMed Central journal article supplement (PMC3245259; doi:10.1371/journal.pone.0029249), 2011-12-22
Supplement: pone.0029249.s004.pdf [file pone.0029249.s004.pdf]

**Table S2.** Summary of risk of bias using the Downs and Black (1998) tool (n = 2).

| <i>Domain</i>                                    | <i>Bate et al (2010)</i> | <i>Vazquez-Alvarez et al (2010)</i> |
|--------------------------------------------------|--------------------------|-------------------------------------|
| Reporting (max. score = 11)                      | 11                       | 2                                   |
| External validity (max. score = 3)               | 0                        | 0                                   |
| Internal validity – bias (max. score 7)          | 5                        | 3                                   |
| Internal validity – confounding (max. score = 6) | 3                        | 2                                   |
| Power (max. score = 5)                           | N/A                      | N/A                                 |
